# Supplementary material
Source: PubMed Central journal article supplement (PMC4727900)
Supplement: NIHMS752107-supplement-Copyright.pdf [file NIHMS752107-supplement-Copyright.pdf]

AUSTRALIAN ACADEMIC PRESS Pty Ltd

Journal - Grant of Licence form

Please complete both Sections A and B, sign, and return this form as a signed PDF document, as soon as possible to Cambridge University Press (cupprod@cambridge.org) By completing, signing and returning this form you hereby agree to the Terms and Conditions enclosed (Doc.AAP.T&C.12.1).

Twin Research and Human Genetics

In consideration of CAMBRIDGE UNIVERSITY PRESS publishing on behalf of Australian Academic Press Pty Ltd in Twin

Research and Human Genetics, a journal owned by The International Society for Twin Studies

the contribution entitled: Variants near CCK receptors are associated with electrophysiological responses to prepulse startle stimuli in a Mexican American cohort
by (all authors' names): Trina M. Norden-Krichmar, Ian R. Gizer, Evelyn Phillips, Kirk C Wilhelmson, Nicholas J. Schork, Cindy L Ehlers

Section A - Grant of rights (fill in either part 1 or 2 or 3)

1 To be filled in if copyright belongs to you
Grant of rights

I/we hereby grant to Australian Academic Press Pty Ltd the exclusive licence to produce and publish and itself further to license the production and publication of the contribution in all forms and media and in all languages throughout the world together with the sole and exclusive right to lease to others the volume and subsidiary rights in the contribution. Copyright in the contribution shall remain my/our property and the copyright notice to be printed on every copy of the contribution shall be in my/our name(s). This grant of rights includes any supplementary materials that I/we may author in support of the online version.

I/we hereby assert my/our moral rights in accordance with the UK Copyright Designs and Patents Act (1988).

Signed (tick one) [ ] the sole author(s)
[X] one author authorised to execute this transfer on behalf of all the authors of the above article

Name (block letters) Cindy L. Ehlers
Institution/Company The Scripps Research Institute
Signature: [Signature] Date: 9/3/15

(Additional authors names and affiliations should be provided on a separate sheet and all should be aware of, and accept, the terms of this form and accompanying form Doc.JEL.T&C12.1.)

2 To be filled in if copyright does not belong to you

a Name and address of copyright holder

b The copyright holder hereby grants to Australian Academic Press Pty Ltd the exclusive licence to publish the contribution in the Journal including any supplementary materials that support the online version and to deal with requests from third parties.

(Signature of copyright holder or authorised agent)

3 US Government exemption

I/we certify that the paper above was written in the course of employment by the United States Government so that no copyright exists.

Signature: Name (Block letters):

Section B - Warranty and disclosure of conflict of interest (to be completed by all authors)

I/we warrant that I am/we are the sole owner or co-owners of the contribution and have full power to make this agreement, and that the contribution has not been previously published, contains nothing that is in any way an infringement of any existing copyright or licence, or duty of confidentiality, or duty to respect privacy, or any other right of any person or party whatsoever and contains nothing libellous or unlawful; and that all statements purporting to be facts are true and that any recipe, formula, instruction or equivalent published in the Journal will not, if followed accurately, cause any injury or damage to the user.

I/we further warrant that permission for all appropriate uses has been obtained from the copyright holder for any material not in my/our copyright including any audio and video material, that the appropriate acknowledgement has been made to the original source, and that in the case of audio or video material appropriate releases have been obtained from persons whose voices or likenesses are represented therein. I/we attach copies of all permission and release correspondence.

I indemnify and keep Australian Academic Press Pty Ltd indemnified against any loss, injury or damage (including any legal costs and disbursements paid by them to compromise or settle any claim) occasioned to them in consequence of any breach of these warranties.

Name (block letters) Cindy L. Ehlers
Signature [Signature] Date 9/3/15

(one author authorised to execute this warranty statement above and conflict of interest statement below on behalf of all the authors of the above article)

Please disclose any potential conflict of interest pertaining to your contribution or the Journal; or write 'NONE' to indicate you declare no such conflict of interest exists. A conflict of interest might exist if you have a competing interest (real or apparent) that could be considered or viewed as exerting an undue influence on you or your contribution. Examples could include financial, institutional or collaborative relationships. The Journal's editor(s) shall contact you if any disclosed conflict of interest may affect publication of your contribution in the Journal.

Potential conflict of interest All authors declare that they have no conflicts of interest

The information provided on this form will be held in perpetuity by Australian Academic Press Pty Ltd and/or Cambridge University Press for record purposes. The name(s) and address(es) of the author(s) of the contribution may be reproduced in the journal and provided to print and online indexing and abstracting services and bibliographic databases.

(This page is left blank)

## AUSTRALIAN ACADEMIC PRESS PTY LTD.

32 Jeays Street Bowen Hills QLD 4006 Australia  
aap@australianacademicpress.com.au

(Doc.AAP.T&C12.1)

### **Terms and Conditions for authors to Twin Research and Human Genetics 'the Journal' owned by The International Society for Twin Studies published by Cambridge University Press on behalf of Australian Academic Press Pty Ltd.**

By completing, signing and returning the Grant of Licence form (Form AAP.12.1) you have agreed to abide by the following Terms and Conditions. Please retain this document for future reference.

A. The Journal's policy is to acquire exclusive publication rights in all contributions. This ensures that requests by third parties to reprint or reproduce a contribution, or part of it, are handled efficiently and in accordance with a general policy that is sensitive both to any relevant changes in international copyright legislation and to the general desirability of encouraging the dissemination of knowledge.

B. Two 'moral rights' were conferred on authors by the UK Copyright Act in 1988. In the UK an author's 'right of paternity', the right to be properly credited whenever the work is published (or performed or broadcast), requires that this right is asserted in writing.

C. Cambridge University Press co-operates in various licensing schemes that allow material to be photocopied within agreed restraints (e.g. the CCC in the USA and the CLA in the UK). Any proceeds received from such licenses, together with any proceeds from sales of subsidiary rights in the Journal, directly support its continuing publication.

D. It is understood that in some cases copyright will be held by the author's employer. If so, Australian Academic Press Pty Ltd requires exclusive permission to deal with requests from third parties.

E. Permission to include material not in your copyright. If your article, including any supplementary materials, includes textual or illustrative material not in your copyright and not covered by fair use / fair dealing, permission must be obtained from the relevant copyright owner (usually the publisher or via the publisher) for the non-exclusive right to reproduce the material worldwide in all forms and media, including electronic publication. Please note that illustrative material (such as photographs/drawings) are not included in fair use/fair dealing provisions, even if acknowledged, and permission should be sought for their use in your article. The relevant permission correspondence should be attached to your grant of licence form.

F. Cambridge University Press acts in accordance with the UK Bribery Act 2010 and the Data Protection Act 1998. Please refer to the Press's relevant policies, (<http://www.cambridge.org/policy/privacy/>), ([http://www.cambridge.org/policy/abc\\_policy/](http://www.cambridge.org/policy/abc_policy/)) which may be revised from time to time.

### **Re-use of your article.**

Notwithstanding the exclusive grant of licence in your article, you retain the following **non-transferable** rights, (subject to appropriate permission having been cleared for any third-party material):

Definitions<sup>1</sup>:

**Author's Original (AO)**, Any version of the article that is considered by you to be of sufficient quality to be submitted for formal peer review by a second party. You accept full responsibility for the article. Content and layout as set out by you.

**Submitted Manuscript Under Review (SMUR)**, Any version of the article that is under formal review managed by Cambridge University Press or Australian Academic Press Pty Ltd. Cambridge University Press

---

<sup>1</sup> adapted from NISO RP-8-2008, Copyright © 2008 by the National Information Standards Organization



and Australian Academic Press Pty Ltd recognize their responsibility to provide objective expert review and feedback to you, and, ultimately, to pass judgment on the fitness of the article for publication with an “accept” or “reject” decision. Content and layout follow Cambridge University Press’s submission requirements.

**Accepted Manuscript (AM)**, The version of the article that has been accepted for publication in the Journal. Cambridge University Press /Australian Academic Press Pty Ltd take permanent responsibility for the article. Content and layout follow Cambridge University Press’s submission requirements. This version may have been revised following peer review but may be subject to further editorial input by Cambridge University Press / Australian Academic Press Pty Ltd.

**Version of Record (VoR)**, A fixed version of the article that has been made available by Cambridge University Press or Australian Academic Press Pty Ltd by formally and exclusively declaring the article “published”. This includes any “early release” article that is formally identified as being published even before the compilation of a volume issue and assignment of associated metadata, as long as it is citable via some permanent identifier(s). This does not include any “early release” article that has not yet been “fixed” by processes that are still to be applied, such as copy-editing, proof corrections, layout, and typesetting. The VoR includes any corrected or enhanced VoR.

#### *Personal or departmental web page*

- 1.1. You may post *either* the AO or SMUR version of your article on your personal or departmental web page.
- 1.2. You may post the AM version of your article on your personal or departmental web page, provided the posting is accompanied by a prominent statement that the article has been accepted for publication and will appear in a revised form, subsequent to peer review and/or editorial input by Cambridge University Press/Australian Academic Press Pty Ltd, in **Twin Research and Human Genetics** published by Cambridge University Press, together with a copyright notice in your name. On publication the full bibliographical details of the article (volume: issue number (date), page numbers) must be inserted after the journal title, together with a link to the Cambridge website address for the Journal.
- 1.3. You may post the VoR version of the article (in PDF or HTML form) on your personal or departmental web page, no sooner than upon its appearance at Cambridge Journals Online, subject to file availability and provided the posting includes a prominent statement of the full bibliographical details, a copyright notice in your name, and a link to the online edition of the journal at Cambridge Journals Online.

#### *Institutional repositories and subject specific repositories*

- 2.1. You may post either the AO or SMUR version of your article in the Institutional Repository of the institution in which you worked at the time the article was first submitted, or (for appropriate journals) in PubMed Central or UK PubMed Central or arXiv.
- 2.2. You may post the AM version of your article in the Institutional Repository of the institution in which you worked at the time the article was first submitted or (for appropriate journals) in PubMed Central or UK PubMed Central or arXiv, provided the posting is accompanied by a prominent statement that the article has been accepted for publication and will appear in a revised form, subsequent to peer review and/or editorial input by Cambridge University Press/ Australian Academic Press Pty Ltd, in **Twin Research and Human Genetics** published by Cambridge University Press, together with a copyright notice in your name. On publication the full bibliographical details of the article (volume: issue number (date), page numbers) must be inserted after the journal title, together with a link to the Cambridge website address for the Journal.
- 2.3. You may post the AM version of the article in Institutional Repositories **outside** of the institution in which you worked at the time the article was first submitted or in non-commercial subject specific repositories only after the additional permission of Cambridge University Press has been obtained (not to be unreasonably withheld).
- 2.4. You may post the VoR version of the article (in PDF or HTML form) in the Institutional Repository of the institution in which you worked at the time the article was first submitted, or (for appropriate journals) in PubMed Central or UK PubMed Central or arXiv, no sooner than **one year** after first publication of the article

in the Journal, subject to file availability and provided the posting includes a prominent statement of the full bibliographical details, a copyright notice in your name, and a link to the online edition of the Journal at Cambridge Journals Online.

2.5. You may post the VoR version of the article (in PDF or HTML form) **after one year** in Institutional Repositories **outside** of the institution in which you worked at the time the article was first submitted or in non-commercial subject specific repositories only after the additional permission of Cambridge University Press has been obtained (not to be unreasonably withheld).

***SSRN and other commercial networks***

3.1. Cambridge University Press/ Australian Academic Press Pty Ltd do not allow full articles to be posted on SSRN, or other such commercial networks.

3.2. You have the right to post an abstract of the article (either AO, SMUR, AM or VoR versions) (for appropriate journals) on the Social Science Research Network (SSRN) or other such commercial networks, provided the abstract is accompanied by a prominent statement that the full article appears in/ shall appear in/ has been submitted to **Twin Research and Human Genetics** published by Cambridge University Press, together with full bibliographical details, a copyright notice in your name, and a link to the online edition of the journal at Cambridge Journals Online.

***Hard copies.***

4.1. You may make hard copies of the article or an adapted version for your own purposes, including the right to make multiple copies for course use by your students, provided no sale is involved.

***Future works by yourself.***

5.1. You may reproduce the article or an adapted version of it in any volume of which you are editor or author. Permission will automatically be given to the publisher of such a volume, subject to normal acknowledgement.

If your reuse is not covered by the above, and you are based outside of the US please consult the Permissions Manager; email: [lnicol@cambridge.org](mailto:lnicol@cambridge.org). If you are based in the US please consult the Rights and Permissions Manager; email [manderson@cambridge.org](mailto:manderson@cambridge.org). If you are based in Australia please consult the Assistant to the Director; [kbuskes@cambridge.org](mailto:kbuskes@cambridge.org).
